# Supplementary material for: Specificities and Commonalities of Carbapenemase-Producing Escherichia coli Isolated in France from 2012 to 2015
Source: PubMed Central journal article supplement (PMC8751382; doi:10.1128/msystems.01169-21), 2022-01-11
Supplement: msystems.01169-21-sf001.pdf [file msystems.01169-21-sf001.pdf]

A

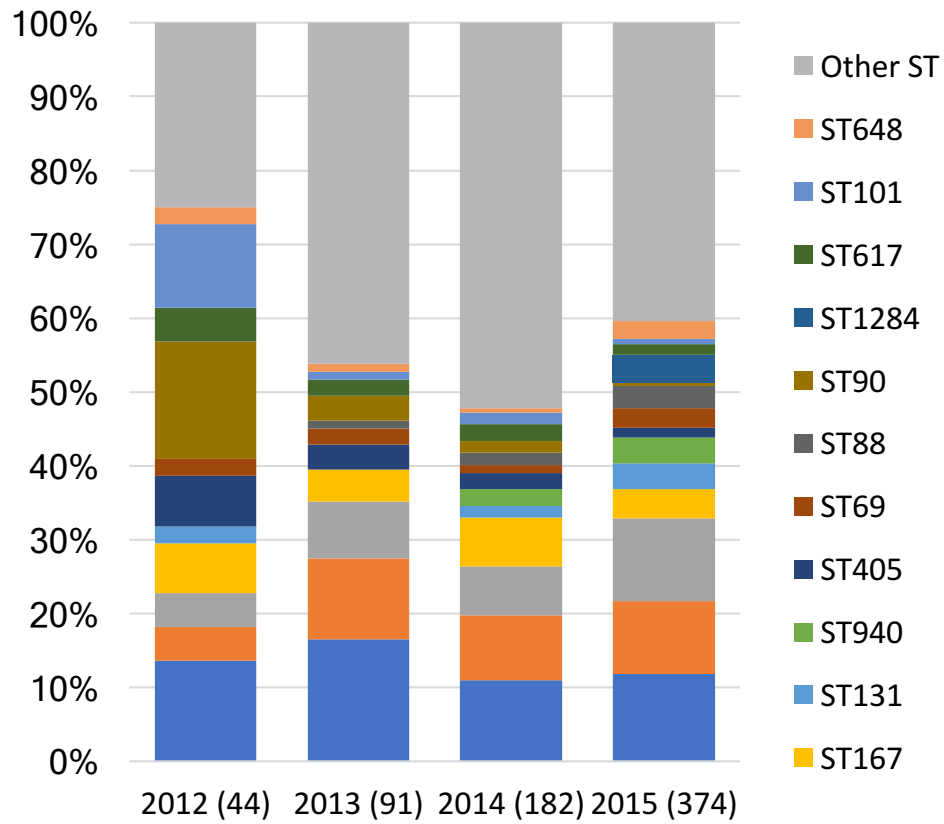

B

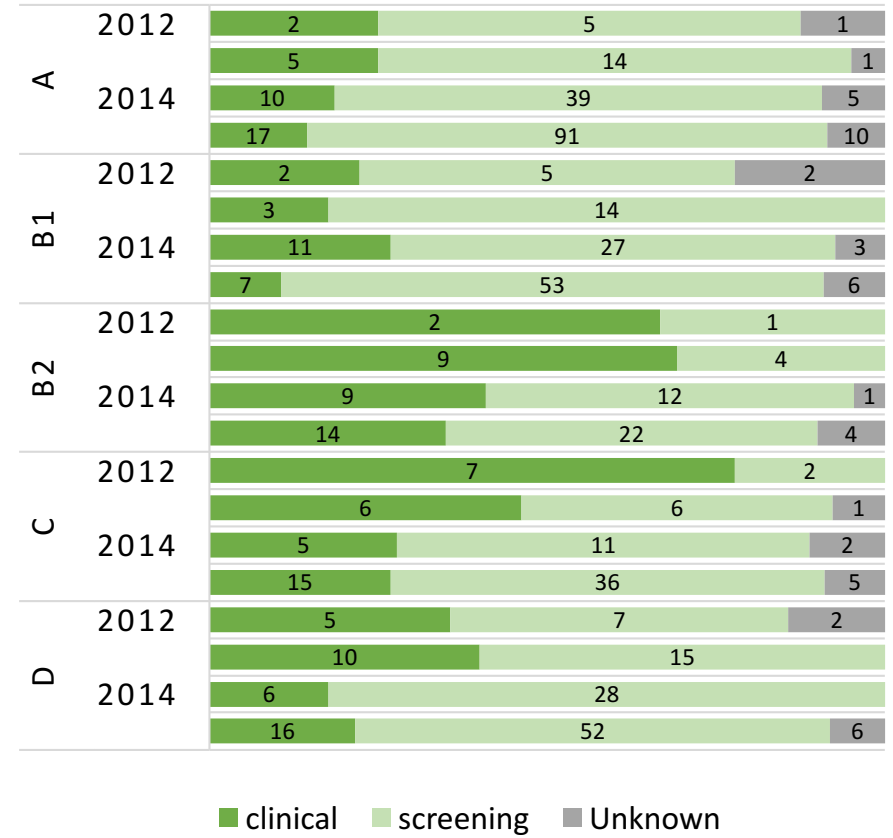

Figure S1. Per-year analysis of the origin of the isolates received by the F-NRC.
