# Supplementary material for: Specificities and Commonalities of Carbapenemase-Producing Escherichia coli Isolated in France from 2012 to 2015
Source: PubMed Central journal article supplement (PMC8751382; doi:10.1128/msystems.01169-21), 2022-01-11
Supplement: msystems.01169-21-sf003.pdf [file msystems.01169-21-sf003.pdf]

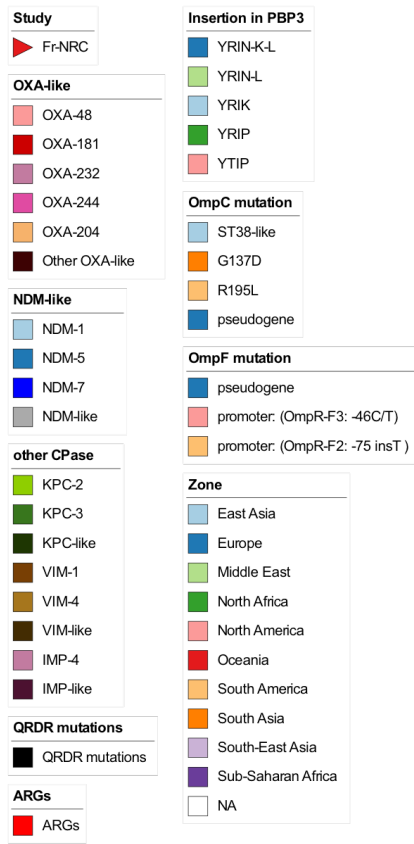

A

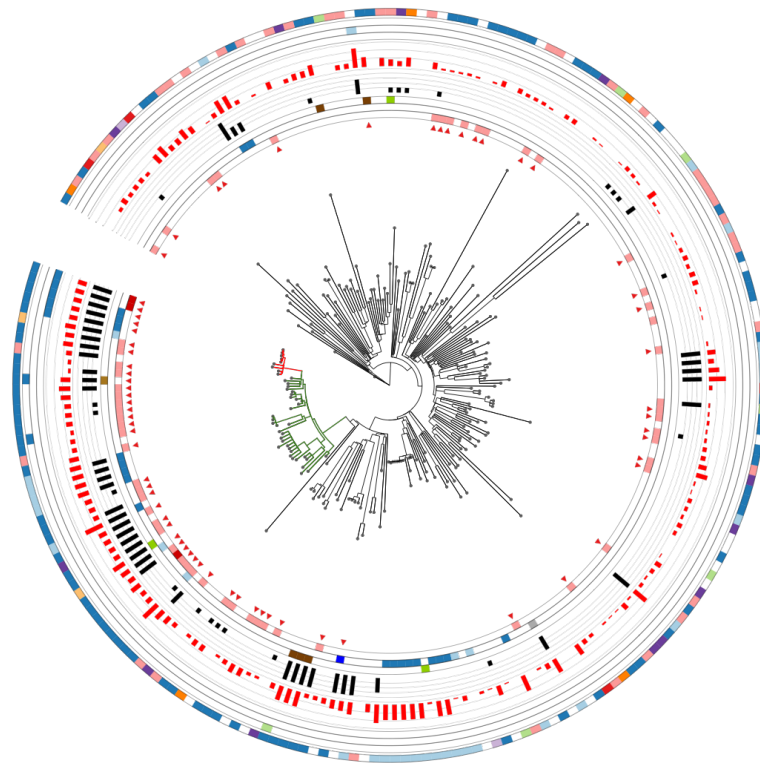

ST10

Tree scale: 0.001

B

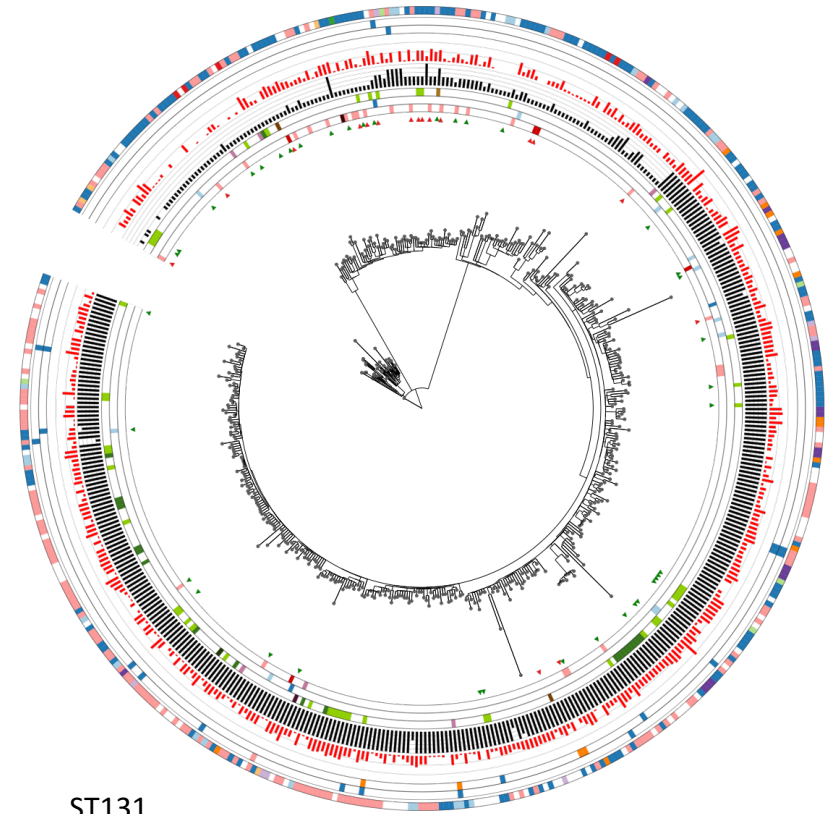

ST131

Tree scale: 0.001

Figure S3. Core genome phylogenies of ST10 and ST131 isolates.
